# Supplementary material
Source: Springer Nature journal article supplement (https://www.springermedizin.de/resource/supplementary/12967_2014_1908_MOESM2_ESM.pdf/9575118)

**A**

□ 0.9% NaCl

△ (Fv<sup>NIP</sup>Fv<sup>106</sup>)<sub>2</sub>◆ (Fv<sup>IEd</sup>Fv<sup>106</sup>)<sub>2</sub>▼ (LD78 β Fv<sup>106</sup>)<sub>2</sub>○ (Fv<sup>NIP</sup>Fv<sup>107</sup>)<sub>2</sub>◇ (Fv<sup>IEd</sup>Fv<sup>107</sup>)<sub>2</sub>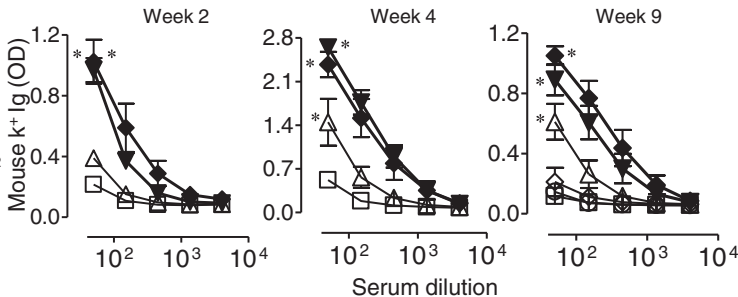**B**△ (Fv<sup>NIP</sup>Fv<sup>106</sup>)<sub>2</sub>◆ (Fv<sup>IEd</sup>Fv<sup>106</sup>)<sub>2</sub>▼ (LD78βFv<sup>106</sup>)<sub>2</sub>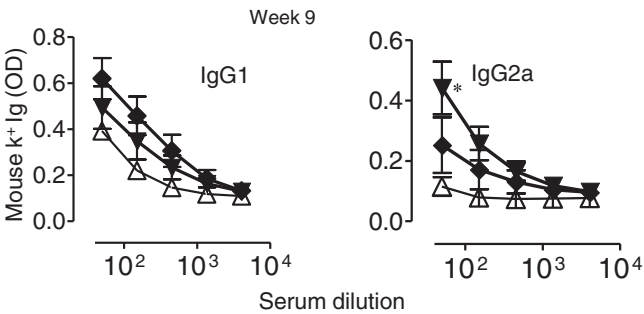

Supplement: MOESM2 [file 9575118]
